1 **Resolving the individual contribution of key microbial populations to enhanced biological**  
2 **phosphorus removal with Raman-FISH**

3 Eustace Y. Fernando<sup>1</sup>, Simon Jon McIlroy<sup>1</sup>, Marta Nierychlo<sup>1</sup>, Florian-Alexander Herbst<sup>1</sup>,  
4 Markus C. Schmid<sup>2</sup>, Michael Wagner<sup>2</sup>, Jeppe Lund Nielsen<sup>1</sup>, and Per Halkjær Nielsen<sup>1\*</sup>

5

6 <sup>1</sup> Center for Microbial Communities, Department of Chemistry and Bioscience, Aalborg  
7 University, Aalborg, Denmark

8 <sup>2</sup> University of Vienna, Department of Microbial Ecology and Ecosystem Science, Research  
9 Network “Chemistry meets Microbiology”, Vienna, Austria.

10

11 \* Corresponding author - Per Halkjær Nielsen, Center for Microbial Communities, Department  
12 of Chemistry and Bioscience, Aalborg University, Fredrik Bajers Vej 7H, DK-9220 Aalborg,  
13 Denmark

14 Tel: +45 9940 8503, email: [phn@bio.aau.dk](mailto:phn@bio.aau.dk)

15

16 **Running title:** Raman quantification of poly-P in PAO

17

18 **Abstract**

19 Enhanced biological phosphorus removal (EBPR) is a globally important biotechnological  
20 process and relies on the massive accumulation of phosphate within special microorganisms.  
21 *Candidatus Accumulibacter* conform to the classical physiology model for polyphosphate  
22 accumulating organisms and are widely believed to be the most important player for the  
23 process in full-scale EBPR systems. However, it was impossible till now to quantify the  
24 contribution of specific microbial clades to EBPR. In this study, we have developed a new tool  
25 to directly link the identity of microbial cells to the absolute quantification of intracellular  
26 poly-P and other polymers under *in situ* conditions, and applied it to eight full-scale EBPR  
27 plants. Besides *Ca. Accumulibacter*, members of the genus *Tetrasphaera* were found to be  
28 important microbes for P accumulation, and in six plants they were the most important. As  
29 these *Tetrasphaera* cells did not exhibit the classical phenotype of poly-P accumulating  
30 microbes, our entire understanding of the microbiology of the EBPR process has to be revised.  
31 Furthermore, our new single-cell approach can now also be applied to quantify storage  
32 polymer dynamics in individual populations *in situ* in other ecosystems and might become a  
33 valuable tool for many environmental microbiologists.

34

35 **Keywords:** Polyphosphate accumulating organisms, Raman microspectroscopy, Fluorescence  
36 *in-situ* hybridization, enhanced biological phosphorus removal

37

## 38 Introduction

39 While the demand for phosphorus (P) is strongly increasing with the growing human  
40 population, global P reserves are limited, present in only few countries, and getting  
41 increasingly more difficult to access<sup>1,2</sup>. Given the vital importance of P as a fertilizer in food  
42 production, its global scarcity is likely to become one of the greatest challenges of the 21<sup>st</sup>  
43 century. On the other hand, the anthropogenic release of P is a major threat to the  
44 environment as it is a main driver of eutrophication, with major contributions from agriculture  
45 and untreated or not sufficiently treated wastewater<sup>3</sup>.

46 Removal of P from wastewater in modern treatment plants can make an important  
47 contribution to addressing these global problems. Efficient removal of P from wastewater can  
48 prevent eutrophication in sensitive water bodies and the removed P can be applied as  
49 fertilizer<sup>4</sup>. Enhanced biological phosphorus removal (EBPR) is an important biological process  
50 in wastewater treatment where P can be removed without addition of chemicals<sup>5,6</sup>. EBPR  
51 exploits the capability of certain microorganisms, termed polyphosphate accumulating  
52 organisms (PAO), to store large quantities of orthophosphate (ortho-P) intracellularly as  
53 polyphosphate (poly-P). This P-enriched biomass can be removed from the treated  
54 wastewater as surplus sludge and used directly as fertilizer or for recovery of P.

55 In EBPR systems, PAO are selected for by introducing alternating anaerobic-aerobic  
56 conditions<sup>7</sup>. Under anaerobic conditions, PAO use poly-P as energy source to take up organic  
57 substrate and convert it to storage compounds, while under subsequent aerobic conditions,  
58 they accumulate large amounts of ortho-P from the wastewater as poly-P and respire the  
59 previously stored organic substrate. By removing biomass after the aerobic phase, poly-P can  
60 be harvested in waste water treatment plants (WWTPs). Several genera have been proposed  
61 as potential PAO, but only members of the betaproteobacterial genus *Candidatus*  
62 *Accumulibacter*<sup>8,9</sup> and the actinobacterial genus *Tetrasphaera*<sup>10,11</sup> are consistently found in  
63 high abundance in full-scale EBPR plants<sup>12</sup>.

64 Interestingly, these two PAO occupy different ecological niches within EBPR plants. *Ca.*  
65 *Accumulibacter*, for which no pure culture is available, have been intensively investigated in  
66 lab-scale enrichment cultures with *in situ* and meta-omic based expression studies to verify  
67 their proposed physiology<sup>13,14,15,16</sup>. During anaerobic periods, *Ca. Accumulibacter* takes up  
68 volatile fatty acids (VFAs), such as acetate, and stores them as intracellular  
69 polyhydroxyalkanoates (PHAs), with the expenditure of energy generated from the hydrolysis  
70 and release of intracellular poly-P reserves. Hydrolysis of glycogen stores provides additional  
71 energy and the reducing power required for PHA storage<sup>17</sup>. In subsequent aerobic periods,  
72 intracellular PHAs are respired to provide energy for cellular metabolism, glycogen generation  
73 as well as ortho-P uptake to replenish the poly-P reserves<sup>17</sup>. Species in the genus  
74 *Tetrasphaera* are much less studied and their physiology is still poorly understood. Members  
75 of the genus have a diverse physiology that includes aerobic respiration, denitrification and  
76 fermentation. In the absence of oxygen, aerobically stored polyphosphate provides an

77 additional energy source<sup>17, 7</sup>. Annotation of representative genomes for the genus suggests  
78 that glucose could be stored as glycogen (but not PHAs) under anaerobic conditions, and  
79 some un-polymerised fermentation products and amino acids have been shown to  
80 accumulate in the cell. Under subsequent aerobic conditions, glycogen and accumulated  
81 intracellular substrates are suggested to be utilized for growth and the replenishment of poly-  
82 P reserves<sup>18; 19</sup>.

83 Despite the global relevance of the EBPR process, the actual contributions of *Ca.*  
84 *Accumulibacter* and *Tetrasphaera* sp., respectively, to bulk P removal are still unknown as no  
85 technique was available for quantifying clade-specific contributions to the EBPR process. For  
86 such measurements not only the *in situ* abundances of PAO clades must be determined, but  
87 also quantitative *in situ* determinations of their intracellular P content at the different stages  
88 and conditions of the EBPR process are necessary. Poly-P is difficult to quantify and is usually  
89 analyzed after extraction<sup>20</sup>, which makes it impossible to quantify the poly-P content in  
90 specific microbial populations. Instead microscopy-based single cell methods are needed,  
91 such as staining of poly-P using 4',6-diamidino-2-phenylindole (DAPI)<sup>21</sup> or Neisser<sup>8</sup>. However,  
92 these staining methods have only been applied to yield qualitative information or relative  
93 quantitative estimates and their specificity towards poly-P is questionable - e.g. the DAPI –  
94 RNA complex is known to interfere with poly-P fluorometric quantification<sup>20</sup>.

95 During the last decade, Raman microspectroscopy has increasingly been used to investigate  
96 physiological features of individual microbial cells in complex environmental samples<sup>22, 23, 24,</sup>  
97<sup>25</sup>. In addition to single cell isotope labelling studies, the identification and quantification of  
98 intracellular storage polymers by this vibrational spectroscopic technique can provide useful  
99 information for microbiologists<sup>26, 27, 28</sup>. Raman microspectroscopy has recently been applied  
100 to monitor glycogen, polyhydroxyalkanoates (PHA), and poly-P in randomly selected microbial  
101 cells from EBPR systems<sup>29, 30, 31</sup>, but has not yet been used for absolute quantification of these  
102 storage polymers. Furthermore, simultaneous identification of the Raman-analyzed cells in  
103 EBPR plant biomass by fluorescence *in situ* hybridization (FISH), which is necessary to assign  
104 *in situ* storage patterns to specific PAO clades, has not yet been performed.

105 In this study we developed a Raman microspectroscopy-based quantitative approach to  
106 determine the levels and dynamics of intracellular polyphosphate and other storage polymers  
107 (PHA and glycogen) in FISH-identified *Tetrasphaera* and *Ca. Accumulibacter* cells. This  
108 approach was applied to reveal which of these PAO is most important for P removal in eight  
109 full-scale EBPR treatment plants and to validate the suggested models of their ecophysiology  
110 in these systems.

111

## 112 **Materials and Methods**

### 113 **Bacterial strains and activated sludge sampling**

114 The activated sludge isolate *Tetrasphaera elongata* strain Lp2 (DSM 14184) was grown  
115 aerobically in modified R2A medium (starch and sodium pyruvate were excluded and glucose  
116 was main substrate) at 26°C. The *Acinetobacter junii* culture (DSM 14698) that was used for  
117 investigating cell fixation effects on intracellular poly-P content was grown on nutrient agar  
118 (beef extract 3 g l<sup>-1</sup> peptone, 5 g l<sup>-1</sup>, agar 15 g l<sup>-1</sup>).

119 Eight different WWTP were investigated in this study. Details about their design, operation,  
120 and performance are given in Table S1 and S2. All plants had stable P removal in the sampling  
121 period with average effluent P concentrations below 1 mg P l<sup>-1</sup>. All plants had minor addition  
122 of iron salts to support the EBPR process (molar ration of Fe-dosage/incoming total P of <0.5).  
123 For P uptake/release experiments, activated sludge samples from Aalborg West WWTP were  
124 collected from the aeration tank and transported at 4°C to the laboratory. For quantification  
125 of the relative abundance and the cell-specific content of P inside PAO directly in full-scale  
126 EBPR plants, sludge samples from the anaerobic (An), hydrolysis (Hyd), anoxic and denitrifying  
127 (DN), oxic and nitrifying tanks (N), and return activated sludge (RAS) were immediately fixed  
128 *in situ* in either 96% ethanol: 1 x phosphate buffered saline – 1:1 (for Gram-positive cells) or  
129 4% PFA (for Gram-negative cells) fixative solutions<sup>32</sup>. They were homogenized in a mechanical  
130 homogenizer (300 RPM, 10 min, Buch & Holm – Heidolph, Germany) in order to disrupt large  
131 sludge flocs. Samples were further homogenized in ultrasonic homogenizer bath (Branson  
132 Ultrasonic 5800, USA) at 40 kHz for 5 min. The settings of the homogenization procedures  
133 used were too weak to interfere with cell integrity<sup>33</sup>. Homogenized samples were aliquoted  
134 onto CaF<sub>2</sub> Raman windows and air dried for later FISH-Raman analyses.

135

### 136 **Phosphorus uptake-release experiments in *T. elongata***

137 *T. elongata* cells were harvested by centrifugation (4,500 x g, 15 min) and washed twice with  
138 chemically defined, modified mineral salts-vitamin medium (MSV) as described by<sup>34</sup>.  
139 Harvested cells were re-suspended in MSV and aerobically incubated for 4 h to exhaust all  
140 intracellular carbon sources. The cultures were then made anaerobic by purging nitrogen gas  
141 for 15 min in sealed serum vials and supplemented with 200 mg l<sup>-1</sup> COD equivalents of glucose  
142 as the sole carbon source. The cultures were kept anaerobic for 3 h with shaking and the cells  
143 were harvested and washed with MSV to remove residual substrate and secreted  
144 fermentation products. The cultures were then incubated under aerobic conditions for 3 h  
145 with shaking and addition of 0.5 mM phosphate. A final concentration of 0.32 mM Na<sub>2</sub>HPO<sub>4</sub>  
146 and 0.18 mM NaH<sub>2</sub>PO<sub>4</sub> was added as a P source and as a buffer (to retain pH at around 7.2),  
147 but no carbon sources were provided. The culture was sampled at set time intervals and the  
148 experiment was conducted in duplicate. The control experiments included heat-killed *T.*  
149 *elongata* biomass (autoclaved at 121°C/15 min) and a living culture with no glucose  
150 supplemented during anaerobic incubation.

151

## 152 **Activated sludge batch experiments for phosphorus uptake and release**

153 Batch experiments were conducted on fresh activated sludge to analyse the P-content per  
154 cell of FISH-identified *Tetrasphaera* or *Ca. Accumulibacter* under anaerobic conditions (low P  
155 content expected) and under aerobic conditions (high P content expected). For this purpose,  
156 fresh sludge was diluted to a total suspended solids concentration of  $1 \text{ g l}^{-1}$  using filtered (0.22  
157  $\mu\text{m}$ , Whatman, UK) effluent and aerated for 1 h to exhaust most intracellular carbon source  
158 reserves. Acetate and glucose were then added to a concentration of 1 mM and 2 mM,  
159 respectively, and the sludge was further supplemented with casamino acids to a COD  
160 equivalent of  $50 \text{ mg l}^{-1}$  (final COD ca.  $500 \text{ mg l}^{-1}$ ). The amended sludge was then made  
161 anaerobic by purging with nitrogen gas for 15 min in serum vials and was kept at room  
162 temperature ( $\sim 22^\circ\text{C}$ ) with shaking for 4.5 h. Subsequently, the biomass was spun down (4,500  
163  $\times \text{g}$ , 15 min) and the supernatant was discarded to remove unused substrates. The biomass  
164 was washed twice with filtered (0.22  $\mu\text{m}$ , Whatman, UK) wastewater. In the next step, 0.5  
165 mM phosphate ( $15.5 \text{ mg P l}^{-1}$ ) was added and the sample was made aerobic by purging with  
166 compressed air. The sludge was kept aerobic with shaking for 4.5 h without supplementation  
167 of a carbon source. pH was 7.0-7.2 throughout the experiments. Samples were taken every  
168 30 min during both anaerobic and aerobic stages and the experiment was conducted in  
169 duplicate. Control experiments were performed with living biomass without supplementing  
170 organic substrate and with heat-killed (autoclaved,  $121^\circ\text{C}/15 \text{ min}$ ) biomass. Activated sludge  
171 samples were fixed, homogenized and aliquots air dried on  $\text{CaF}_2$  Raman windows for later  
172 FISH and Raman analyses.

173

## 174 **Raman micro-spectroscopy and calibration of the instrument**

175 A Horiba LabRam HR 800 Evolution (Jobin Yvon, France) Raman micro-spectrometer  
176 instrument equipped with a Torus MPC 3000 (UK) 532.17 nm 341 mW solid-state  
177 semiconductor laser was used for all experiments. The laser power was attenuated to 2.1 mW  
178  $\mu\text{m}^{-2}$  incident power density on the sample by a set of neutral density (ND) filters. An  
179 integrated Olympus (model BX-41) fluorescence microscope was used for selecting FISH  
180 probe labelled cells of interest for Raman analysis. A dry objective with a numerical aperture  
181 of 0.75 (Olympus M Plan Achromat, Japan) (corresponding to a measured laser spot size of  
182 about  $2.6 \mu\text{m}$  – Supplementary text-1) and a magnification of 50X (working distance 0.38 mm)  
183 was used to focus the laser beam on the sample and to collect the Raman scattered light.  
184 According to the Rayleigh criterion, these optical attributes of the system translate to a spatial  
185 resolution of approximately  $0.5 \mu\text{m}$  and an axial resolution of about  $1.4 \mu\text{m}$ . The grating used  
186 during all measurements was 600 mm/groove and the spectral range chosen spanned from  
187  $200 \text{ cm}^{-1}$  to  $1850 \text{ cm}^{-1}$ . The wavenumber region from  $300 \text{ cm}^{-1}$  to  $1800 \text{ cm}^{-1}$  is known as the  
188 fingerprint region in terms of characterisation of biological material, as it contains the most  
189 important spectral features<sup>35</sup>. The Raman spectrometer slit width was  $100 \mu\text{m}$  and the Raman  
190 confocal pinhole diameter was  $72 \mu\text{m}$  during all measurements. Raman scattered light was

191 detected by an Andor Charge Coupled device (CCD) (UK) cooled at  $-68^{\circ}\text{C}$ . The spectra were  
192 recorded and processed using the LabSpec version 6.4 software (Horiba Scientific, France). All  
193 spectra were baseline corrected using a 6<sup>th</sup> order polynomial fit and the cosmic ray  
194 interferences were removed using the cosmic ray removal feature in the software. All spectra  
195 were averages of two individual spectra with 10 s integration time. The Raman spectrometer  
196 was calibrated before all measurements to the first-order signal of a silicon wafer occurring  
197 at  $520.7\text{ cm}^{-1}$ . All Raman sample measurements were conducted on optically polished  $\text{CaF}_2$   
198 windows (Crystran, UK), which produces a single strong Raman signal at  $321\text{ cm}^{-1}$ , that also  
199 serves as an internal reference point in every spectrum.

200

### 201 **Raman spectroscopy-based quantification of polyphosphate**

202 The method used for quantification of polyphosphate in this study relies on a linear  
203 dependence of the Raman signal on the amount of analyte (poly-P) per unit surface area in  
204 the sample. For all cellular measurements, it was assumed that the cell monolayers were  
205 transparent and had a negligible absorption. Poly-P is a strong Raman scatterer with  
206 characteristic signature peaks occurring at  $690\text{ cm}^{-1}$  and  $1170\text{ cm}^{-1}$  wavenumber regions,  
207 attributed to  $-\text{P}-\text{O}-\text{P}-$  stretching vibrations (phosphoanhydride bonds) and  $\text{PO}_2^-$  stretching  
208 vibrations<sup>29</sup> (Fig. S1), respectively. Both peaks could be observed simultaneously and  
209 unambiguously at the correct wavenumber region, in all of the poly-P containing spectra.  
210 Furthermore, the Raman signature band at  $1170\text{ cm}^{-1}$  of poly-P is not found at relevant  
211 intensities in spectra from other phosphate containing cellular chemical species such as ATP  
212 and AMP (Fig. S2). The strongest Raman peak for poly-P appears at  $1170\text{ cm}^{-1}$  in the spectrum,  
213 whereas the strongest Raman peaks for ATP and AMP occur at  $1125\text{ cm}^{-1}$  and  $990\text{ cm}^{-1}$ ,  
214 respectively.

215 The material density of poly-P standard solutions mounted and dried on  $\text{CaF}_2$  windows  
216 exhibited a linear correlation to the Raman signal intensity at the wavenumber  $1170\text{ cm}^{-1}$  (Fig.  
217 S3). When the Raman signal intensity shows a linear dependence on the material density, a  
218 calibration coefficient ( $k$ ) can be calculated. The arbitrary Raman intensity CCD readout  
219 counts were converted to absolute surface material density of poly-P by means of the  
220 calibration coefficient ( $k$ ) as detailed earlier<sup>36</sup>. A sodium polyphosphate standard solution  
221 ( $0.5\text{ }\mu\text{L}$ ) with a concentration of  $0.1\text{ mg P mL}^{-1}$  was mounted and air dried on the  $\text{CaF}_2$  Raman  
222 window. The dried poly-P droplet occupied an area of about  $0.3\text{ mm}^2$  (Fig. S4), corresponding  
223 to a material density about  $0.16\text{ }\mu\text{g mm}^{-2}$ . The averaged material density can be written as;

$$224 \quad d = m/A,$$

225 where  $d$  is material density ( $\text{g}/\mu\text{m}^2$ ),  $m$  is amount of material ( $\text{g}$ ) and  $A$  is the scanned area  
226 ( $\mu\text{m}^2$ ). Furthermore,

$$227 \quad d = m/A = k * \Sigma S/N,$$



228 where  $k$  is the calibration coefficient ( $\text{g}/\mu\text{m}^2/\text{count}$ ),  $\Sigma S$  is the cumulative analyte Raman signal  
229 strength (counts) and  $N$  is the total spectra sampling points in the designated map area.  
230 Rearrangement gives  $k$ :

$$231 \quad k = [m/A] * [N/\Sigma S]$$

232 The area of the mapped droplet was calculated by ImageJ software and was estimated to be  
233  $324,473 \mu\text{m}^2$  (Fig. S4) <sup>37</sup>. The total mapped area contained 1452 individual spectra. The  
234 cumulative poly-P Raman signal strength at the Raman marker wavenumber ( $1170 \text{ cm}^{-1}$ )  
235 recorded for the scanned area was 450,042 CCD counts. This gives a  $k$  for poly-P for this  
236 particular set of conditions of  $4.98 \pm 0.2 * 10^{-16} \text{ g P } \mu\text{m}^{-2} \text{ count}^{-1}$  ( $n = 6$ ).

237 Assuming that *T. elongata* cells are rods with hemispherical ends, the two-dimensional area  
238 occupied by cells on the Raman slide was estimated using ImageJ software. The average  
239 estimated area occupied by *T. elongata* cells on  $\text{CaF}_2$  Raman slides was  $3.79 \mu\text{m}^2$  ( $n = 100$   
240 single cells). *T. elongata* cell counts were conducted as detailed earlier <sup>38</sup>. *T. elongata* cell  
241 number in the culture (DAPI stained cell counts) was determined to be  $7.9 \pm 1.7 * 10^7$  cells  $\text{ml}^{-1}$   
242 <sup>1</sup>. These values were used for the Raman-based estimation of the fraction of phosphorus  
243 being assimilated in the form of poly-P within *T. elongata* cells under P-uptake conditions. Cell  
244 volumes were calculated from fluorescence images of *Tetrasphaera* and *Ca. Accumulibacter*  
245 ( $n = 100$  cells) as described earlier in <sup>39</sup>. P accumulation per *T. elongata* cell was validated  
246 using bulk liquid P quantification at key stages of the P-uptake release experiment  
247 (Supplementary text – 2).

248 Standard of sodium polyphosphate (CAS # - 68915-31-1) was obtained from Sigma Aldrich,  
249 UK. Adenosine 5'-triphosphate (ATP) disodium salt was purchased from Fluka (Germany) and  
250 adenosine 5'-monophosphate (AMP) sodium salt from Boehringer Mannheim GMBH  
251 (Germany).

252

### 253 **Analysis of PHA and glycogen**

254 Absolute quantification of PHA and glycogen was conducted using the same approach as for  
255 poly-P. Poly-3-hydroxybutyric acid-co-3-hydroxyvaleric acid dissolved in  $\text{CHCl}_3$  and glycogen  
256 dissolved in water were mounted on  $\text{CaF}_2$  Raman windows in a range of densities to estimate  
257 their calibration coefficients. PHB-co-HV and glycogen droplets were Raman mapped as  
258 described above and  $k$ -values were determined to be  $1.04 \pm 0.1 * 10^{-14} \text{ g C } \mu\text{m}^{-2} \text{ counts}^{-1}$  and  
259  $2.37 \pm 0.2 * 10^{-15} \text{ g C } \mu\text{m}^{-2} \text{ counts}^{-1}$ , respectively. PHAs produce characteristic Raman peaks at  
260  $432 \text{ cm}^{-1}$ ,  $840 \text{ cm}^{-1}$ , and  $1726 \text{ cm}^{-1}$ , respectively, that are attributed to  $\delta$  (C-C) skeletal  
261 deformations and  $\nu(\text{C}=\text{O})$  stretching vibrations <sup>40</sup>, whereas glycogen produces strong  
262 characteristic Raman peaks within the regions of  $478 - 484 \text{ cm}^{-1}$  and  $840 - 860 \text{ cm}^{-1}$ , which  
263 are attributed to C-C skeletal deformation and CC skeletal stretch, respectively <sup>39</sup> (Fig. S1). For  
264 PHA and glycogen, Raman markers at  $1726 \text{ cm}^{-1}$  and  $481 \text{ cm}^{-1}$  respectively, were used for all



265 quantifications. Raman calibrations for various material densities of PHA and glycogen are  
266 shown in Fig. S5.

267 Standard glycogen sourced from oyster (CAS # - 9005-79-2) and poly (3-hydroxybutyric acid-  
268 co-3-hydroxyvaleric acid) (CAS # - 80181-31-3) were obtained from Sigma Aldrich, UK.

269

## 270 **Combined FISH-Raman analysis of activated sludge**

271 FISH analyses were conducted as described earlier <sup>32</sup>, but without the addition of sodium  
272 dodecyl sulfate (SDS) in the final washing buffer in order to minimize loss of intracellular  
273 storage compounds and to minimize biomass loss from CaF<sub>2</sub> Raman slides during FISH  
274 washing procedure. The FISH probes applied in this study were the *Ca. Accumulibacter*-  
275 specific PAO651 probe <sup>8</sup>, the *Tetrasphaera*-specific probe Actino658 <sup>11</sup> and the general  
276 EUBmix probe set (EUB 338, EUB 338 II, and EUB 338 III) <sup>41</sup> targeting most bacteria. *Ca.*  
277 *Accumulibacter* is routinely detected with the PAOmix probe set (including PAO462, PAO651,  
278 and PAO846) <sup>8</sup>, however, it was recently shown that the PAO651 probe alone gives better  
279 specificity for the genus without a substantial sacrifice in coverage <sup>42</sup>. In the 8 EBPR plants  
280 investigated here, the biovolume quantified by the PAOmix probe set was 5-15% greater than  
281 with the PAO651 probe with the difference almost exclusively made up by *Propionivibrio*  
282 targeted by the probe Prop207 <sup>42</sup> (Supplementary text-3). *Propionivibrio* is supposed not to  
283 be a PAO <sup>42</sup> and our Raman investigations confirmed that it did not contain poly *in situ*.  
284 Several probes are available to target sub-groups of the *Tetrasphaera* genus in activated  
285 sludge <sup>11,37</sup> – however our recent study revealed low diversity of the genus in Danish systems  
286 <sup>12</sup> and the Actino658 probe provides the most specific coverage of the dominant member of  
287 the genus. In addition, *in silico* analyses of the specificity of the sub-group probes shows that  
288 they cannot any longer be regarded as specific (S. McIlroy, unpublished). The 5' ends of the  
289 oligonucleotide probes were labelled with 5(6)-carboxyfluorescein-*N*-hydroxysuccinimide  
290 ester (FLUOS) or with the sulfoindocyanine dyes (Cy3) (Thermo-Fisher Scientific, Germany).  
291 The FISH signal was observed without mounting media using the in-built fluorescence  
292 microscope of the Raman system. Labelled single cells of interest were identified and marked  
293 for Raman analysis using the LabSpec 6.4 software. As the fluorescent signal from the Cy3  
294 label interferes with the Raman signal the former was subsequently bleached as previously  
295 described <sup>43</sup>. To achieve this, the 532.17 nm Raman laser, set at the intensity used for sample  
296 analysis, was shone on the analysed area of the sample for 5 min (Fig. S6). The Raman signal  
297 from FISH-identified-cells of interest was then acquired with the same settings as described  
298 for the pure culture analyses.

299

## 300 **Quantitative FISH analysis of full-scale sludge samples**

301 Quantitative FISH (qFISH) values of PAO populations were calculated as a percentage area of  
302 the total biovolume stained with the EUBmix probe set <sup>44,40</sup> that also hybridized with the  
303 specific probe. qFISH analyses were based on 30 fields of view taken at 630 x magnification  
304 using the Daim image analysis software <sup>45</sup>. Microscopy was performed with a White Light  
305 Laser Confocal Microscope (Leica TCS SP8 X, Leica Microsystems, Kista, Sweden). Quantitative  
306 FISH was conducted on fixed samples from the aeration tanks of all EBPR plants investigated.  
307 The qFISH results were similar for samples obtained from other process tanks due to high  
308 recirculation rates (data not shown).

309

### 310 **Analysis of P and PHA leakage from cells due to cell fixation and the FISH procedure**

311 Potential loss of intracellular polymers during fixation of cells (in either PFA or ethanol) and  
312 the FISH procedure (including 4 h incubations in formamide hybridization buffer at 46°C) were  
313 investigated, as these steps were performed prior to Raman analyses. To test this, the Gram-  
314 positive PAO *T. elongata* and the Gram-negative organism *A. junii*, harvested at growth stages  
315 at which the intracellular poly-P content was high, were used. *A. junii* was chosen because no  
316 *Ca. Accumulibacter* monoculture has been isolated to date and *A. junii* cells are known to take  
317 up large quantities of poly-P <sup>46</sup>. *A. junii* was grown in a modified Fuhs and Chen semi-defined  
318 medium <sup>47</sup> containing extra ortho-P. The composition of the medium was as follows (per  
319 Litre): Sodium acetate, 5 g; (NH<sub>4</sub>)<sub>2</sub>SO<sub>4</sub>, 2 g; MgSO<sub>4</sub>·7H<sub>2</sub>O, 0.5 g; KH<sub>2</sub>PO<sub>4</sub>, 0.25 g; CaCl<sub>2</sub>·2H<sub>2</sub>O,  
320 0.2 g; casamino acids, 0.6 g. The culture was grown at 30°C for 96 h. The Raman signal for  
321 poly-P accumulation in unfixed *A. junii* cells was highest on day 4. Aliquots of the two  
322 monocultures, *T. elongata* and *A. junii*, with a high poly-P content were homogenized and  
323 fixed. The fixed cells were subjected to the standard FISH procedure using the general EUB338  
324 mix probes. Both fixed and unfixed preparations of the *T. elongata* and *A. junii* cells, with and  
325 without FISH, were then analyzed by Raman microspectroscopy for their intracellular poly-P  
326 contents (n=100 cells in each instance). For assessing PHA loss during cell fixation and storage,  
327 pure cultures of *Bacillus subtilis* and *Pseudomonas aeruginosa* were used as representatives  
328 of Gram-positive and Gram-negative, PHA producing, model organisms. *B. subtilis* and *P.*  
329 *aeruginosa* were grown aerobically in media known to give a high PHA yield <sup>48,49</sup>.

330

### 331 **Chemical analyses**

332 Analysis of bulk ortho-P levels was carried out using the ammonium molybdate based  
333 colorimetric standard method ISO 6878:2004. The cultures were centrifuged at 4,000 x g and  
334 the supernatant was filtered through 0.22 µm polyvinylidene fluoride (PVDF) filters (Millipore,  
335 UK) and the filtrate was used for bulk ortho-P determinations. The chemical oxygen demand  
336 (COD) of the samples was determined using the acidified dichromate-based colorimetric  
337 commercial kit LCK-414 (HACH-Lange, UK). The total P content of the activated sludge samples

338 was analyzed by inductively coupled plasma – atomic emission spectroscopy (ICP-AES), as  
339 described earlier<sup>50</sup>.

340

## 341 **Results and Discussion**

### 342 **Poly-P accumulation in *T. elongata* during feed-famine cycling**

343 *T. elongata* is one of the few known PAO that exist in pure culture and it was thus selected to  
344 test for qualitative and quantitative assessment of its intracellular storage polymers using  
345 Raman microspectroscopy. However, it should be noted that *T. elongata* is closely related but  
346 not identical to *Tetrasphaera* strains found in full-scale WWTPs<sup>37</sup>. *T. elongata* cultures  
347 showed the typical ortho-P uptake/release patterns of a PAO during sequential feed-famine  
348 cycling (Fig. 1A). The increase of bulk liquid ortho-P concentration during the anaerobic “feed”  
349 conditions was coupled to uptake of organic substrate from the bulk medium, reflected by  
350 the decrease of COD. The drop in ortho-P levels in the bulk medium during the aerobic  
351 conditions was reflected by a strong increase of poly-P in *T. elongata* cells (see below).

352 Raman microspectroscopy was applied to measure the intracellular poly-P storage at different  
353 stages of the feed-famine cycling. As expected, the average poly-P content decreased during  
354 anaerobic conditions and increased during aerobic famine conditions. (Fig. 1B). The changes  
355 in the bulk P concentration and the dynamics of the intracellular P throughout the experiment  
356 is corroborating evidence that the P changes in the bulk medium were due to the release and  
357 uptake of P by *T. elongata*. The P-content of individual cells showed a broad distribution (Fig.  
358 1C) with maximum values around  $2 \cdot 10^{-13}$  g P cell<sup>-1</sup> at the end of the aerobic stage. Under  
359 anaerobic conditions, a large fraction of cells had no measurable poly-P. The average cellular  
360 P content at the end of the anaerobic (3 h) and aerobic (7 h) stages was  $0.19 \cdot 10^{-13}$  g P cell<sup>-1</sup>  
361 and  $1.2 \cdot 10^{-13}$  g P cell<sup>-1</sup>, respectively (calculations in Supplementary text - 4). The broad  
362 distribution of intracellular poly-P contents in the aerobic stage shows population  
363 heterogeneity in the capability to store poly-P, perhaps due to variation in growth stages or  
364 different strains covered by the broad probe. Based on these calculations, the average  
365 intracellular poly-P during the aerobic phase corresponded to 8.0 mg P l<sup>-1</sup>. The difference in  
366 this value to the same estimation from bulk ortho-P levels of 9.3 mg P l<sup>-1</sup> is likely explained by  
367 the incorporation of some of the ortho-P into the biomass during growth.

368 These results demonstrate the utility of Raman microspectroscopy for the direct  
369 quantification of intracellular poly-P and the analysis of its storage dynamics under *in situ*  
370 conditions. Previous studies have studied such dynamics only in a relative manner, with the  
371 P-content normalized to the biomass using a biomass marker (amide I at 1660 cm<sup>-1</sup>)<sup>30</sup>. Other  
372 qualitative imaging-based assessments of poly-P inclusions such as DAPI staining<sup>51</sup> have their  
373 inherent disadvantages due to their inability to quantify the levels of poly-P accumulation and  
374 their non-specific binding to other cellular components such as lipids and nucleic acids<sup>20,52</sup>.

375 Surprisingly and inconsistent with the metabolic model inferred from comparative genomics,  
376 we could not detect glycogen in *T. elongata* by Raman microspectroscopy at any stage of the  
377 P-uptake/release experiments (Fig. S7).

### 378 **Dynamics of storage compounds in *Ca. Accumulibacter* and *Tetrasphaera* in activated** 379 **sludge during feed-famine cycling experiment**

380 Initially, potential loss of intracellular polymers during cell fixation and FISH was assessed with  
381 cultures of representative Gram-negative and Gram-positive bacteria. Cell fixation and FISH  
382 lead to a loss of up to 20% of the overall poly-P Raman signal for both types of bacteria (Fig.  
383 S8. Similarly, for PHAs, the Raman signal loss following fixation and FISH amounted to a  
384 maximum of 12%, for both Gram-negative and Gram-positive bacteria. Therefore, the applied  
385 FISH-Raman method for quantitative analyses of FISH-identified cells will slightly  
386 underestimate the actual amount of these storage compounds. An average loss of 12% and  
387 8% for poly-P and PHA, respectively, have been corrected for in the analyses and mass  
388 balances presented in this study.

389 In the next step, several batch P-cycling experiments with fresh activated sludge from Aalborg  
390 West WWTP were carried out to provide insights into the *in situ* dynamics of intracellular  
391 polymers in FISH probe-defined *Ca. Accumulibacter* and *Tetrasphaera* (Fig 2). During the  
392 anaerobic feed phase, most of the *Ca. Accumulibacter* and *Tetrasphaera* cells contained little  
393 intracellular poly-P (on average  $0.48 \cdot 10^{-13}$  g P cell<sup>-1</sup> and  $0.27 \cdot 10^{-13}$  g P cell<sup>-1</sup>, respectively – Fig.  
394 3B and 1B). During the aerobic famine phase, most cells of both species contained several  
395 fold higher levels of poly-P than in the anaerobic phase (average of  $6.46 \cdot 10^{-13}$  g P cell<sup>-1</sup> and  
396  $1.77 \cdot 10^{-13}$  g P cell<sup>-1</sup>, respectively). The fluctuations of intracellular poly-P contents  
397 corroborated well with the dynamics of the bulk ortho-P concentrations observed during the  
398 incubation (Fig. 3A, 3B and 3C). These lab-scale P uptake/release experiments demonstrated  
399 that in this activated sludge *Ca. Accumulibacter* cells were capable of storing at least three  
400 times as much poly-P per cell compared to *Tetrasphaera*. However, as the cell volumes of the  
401 two PAO types are very different, with *Ca. Accumulibacter* nearly three times larger than  
402 *Tetrasphaera* ( $9.2 \pm 2.4 \mu\text{m}^3$  and  $2.9 \pm 1.1 \mu\text{m}^3$ ), both PAO clades had very similar volumetric  
403 average maximum P-contents of  $0.70 \cdot 10^{-13}$  g P  $\mu\text{m}^{-3}$  and  $0.68 \cdot 10^{-13}$  g P  $\mu\text{m}^{-3}$ , respectively.  
404 Consequently, the maximum P-storage capacity of both PAO clades per biovolume was highly  
405 similar in this WWTP. Recently, it was shown that some P-uptake (without demonstrated  
406 poly-P formation) may occur at anaerobic conditions of P-cycling experiments of  
407 *Tetrasphaera* enriched lab-scale cultures<sup>53</sup>. This effect, however, was not observed  
408 throughout this study, either in anaerobic stages of pure culture experiments employing *T.*  
409 *elongata* monocultures, or *Tetrasphaera* cells found *in situ* in full-scale EBPR plants (see later).

410 In accordance with the generally accepted metabolic model for PAO<sup>17,7</sup>, intracellular PHA and  
411 glycogen in *Ca. Accumulibacter* showed a marked difference in Raman signal intensities  
412 between the anaerobic and aerobic phase (Fig. 3D). PHA accumulated during the anaerobic  
413 feed phase and was consumed during the aerobic famine phase with glycogen showing the

414 opposite pattern. Consistent with the pure culture experiments with *T. elongata* and previous  
415 literature data <sup>11,18,19</sup>, probe-defined *Tetrasphaera* cells in the activated sludge did not show  
416 Raman signatures for PHAs during the P-cycling experiments. Surprisingly but consistent with  
417 the pure culture data (Fig. S7), no glycogen was detected in probe-defined *Tetrasphaera* in  
418 activated sludge. Furthermore, no other potential storage compound detectable by Raman  
419 spectroscopy was observed in *T. elongata* (Fig. S7) or in probe-defined *Tetrasphaera* in  
420 activated sludge. Possibly, *Tetrasphaera* relies under anaerobic conditions on hydrolysis of  
421 poly-P in addition to possible fermentation of glucose or amino acids for anaerobic growth,  
422 and/or storage of these for subsequent growth and replenishment of poly-P during aerobic  
423 conditions. Another possibility is that the presence of glycogen in *Tetrasphaera*, as reported  
424 in other studies, is wrong. Hitherto, no glycogen specific analysis method has been employed  
425 to quantify the polymer in its native state within single bacterial cells, including *Tetrasphaera*.  
426 The glucose monomeric units measured after acid hydrolysis of cells were inferred to  
427 originate from glycogen stored in cells in all of the previous studies <sup>18</sup>. This obviously is not  
428 optimal due to the ubiquity of glucose and other similar sugars in the intracellular milieu, even  
429 when the cells are incapable of storing glycogen. The strength of the current FISH-Raman  
430 method is that it does not rely on such inferences and that it can directly measure the polymer  
431 in question in its native state at a single-cell level. It has been shown that *T. elongata* can grow  
432 by fermentation <sup>19</sup>, and probe-defined *Tetrasphaera* in full-scale EBPR plants likely ferment  
433 glucose after several of days anaerobic conditions <sup>54</sup>, so fermentation is likely a key metabolic  
434 feature in tandem with poly-P formation/degradation in their successful competition to many  
435 other microbes in EBPR plants.

436

#### 437 ***In situ* quantification of storage polymers in *Ca. Accumulibacter* and *Tetrasphaera* in full-** 438 **scale EBPR plants**

439 *Ca. Accumulibacter* has generally been considered as the most important PAO in EBPR plants  
440 world-wide <sup>7</sup>. However, recent investigations have indicated that *Tetrasphaera* are more  
441 abundant in many full-scale plants <sup>12</sup>, but abundance data alone are insufficient to judge the  
442 importance of a PAO for the EBPR process. As the ecophysologies of these two PAO clades  
443 appear to be very different, it is of primary importance to know what their actual relative  
444 contributions to P removal in full-scale EBPR systems are, in order to lay the foundation for  
445 knowledge-based optimization of plant design and operation.

446 In the current study, this key question was tackled by analyzing eight full-scale EBPR plants  
447 representing two different designs (recirculating and alternating) that all have had good and  
448 stable operation for several years <sup>12</sup> (Table S1 and S2). Bulk concentration of ortho-P in the  
449 aerobic tank of all plants was 0.2-0.6 mg P l<sup>-1</sup>, which was well below the maximum tolerated  
450 effluent concentration of 1.0 mg P l<sup>-1</sup> (see Table S1). In the different tanks of these EBPR  
451 plants, the biovolume of *Tetrasphaera* and *Ca. Accumulibacter* and the amount of  
452 intracellular poly-P, PHA, and glycogen in these PAO was measured by quantitative FISH and



453 FISH-Raman microspectroscopy, respectively. qFISH analyses showed that *Ca. Accumulibacter*  
454 and *Tetrasphaera* were present in all plants in abundances of 1.2 to 6.6% (relative biovolume  
455 of the target population to the total biovolume of all FISH-detectable cells). *Tetrasphaera*  
456 outnumbered *Ca. Accumulibacter* in 5 of the 8 plants investigated (Fig. 3, Table 1). In  
457 accordance with the result from the batch experiments (Fig. 3), and the current EBPR model,  
458 the level of intracellular poly-P in both PAO was lowest in the anaerobic tanks and highest in  
459 the aerobic tanks. As predicted by the EBPR model, the PHA levels were also dynamic in *Ca.*  
460 *Accumulibacter* with highest levels in the anaerobic tank and lowest under oxic conditions,  
461 reflecting uptake of short-chain fatty acids in the anaerobic tank and growth and respiration  
462 in the oxic tank. Likewise, the intracellular glycogen content in *Accumulibacter* was lowest in  
463 the anaerobic tanks and highest in the aerobic tanks, reflecting the production of reducing  
464 power for PHA formation under anaerobic conditions and replenishment of glycogen from  
465 PHA in the presence of oxygen, respectively. Consistent with the batch experiments with  
466 sludge from a single plant, PHA and glycogen were not observed in *Tetrasphaera in situ* in any  
467 of the full-scale EBPR plants (to enhance clarity, the results for two typical plants are shown  
468 in Fig. 4 while the remaining six are shown in Fig. S9). The stoichiometry of the  
469 formation/degradation of the intracellular storage compounds for *Ca. Accumulibacter* cells  
470 that we observed using the Raman-FISH based single-cell method for the full-scale plants are  
471 fully consistent with bulk data reported previously from lab-scale studies using enriched  
472 biomass of this PAO. For example, the molar ratio of glycogen formation/PHA degradation  
473 (C/C) of 0.3 – 0.4 that we measured in the aerobic tanks of the EBPR plants, fully matches data  
474 obtained in lab-experiments with activated sludge enriched in *Ca. Accumulibacter*<sup>55,9</sup>. These  
475 consistencies provide additional strong support for the suitability of FISH-Raman  
476 microspectroscopy to quantitatively follow storage compound dynamics *in situ* in FISH probe-  
477 defined taxa.

478 Interestingly, in none of the eight WWTP the *Ca. Accumulibacter* stored *in situ* under aerobic  
479 conditions as much poly-P per cell than in the lab-scale incubation experiment with activated  
480 sludge from the Aalborg West WWTP (that was also included in the eight WWTP) and plenty  
481 of organic substrate in the anaerobic phase. While  $6.5 \times 10^{-13}$  g P cell<sup>-1</sup> were measured in the  
482 lab-scale experiments, the highest recorded *in situ* value for *Ca. Accumulibacter* was  $4.6 \times 10^{-13}$   
483 g P cell<sup>-1</sup> in the Hjørring WWTP and the lowest *in situ* value was  $3.1 \times 10^{-13}$  g P cell<sup>-1</sup> in the  
484 Viby plant. Similarly, the poly-P content of the *Tetrasphaera* cells in all plants was lower than  
485 in the lab-scale experiment with activated sludge ( $1.77 \times 10^{-13}$ g) with the highest value ( $1.5 \times$   
486  $10^{-13}$ g P cell<sup>-1</sup>) recorded in the Egaa plant and the lowest value of  $0.89 \times 10^{-13}$  g P cell<sup>-1</sup>  
487 measured in the Viby plant (Fig. 4 and Fig. S9). The level of PHA uptake for *Ca. Accumulibacter*  
488 cells was similar in all plants in the anaerobic tanks ( $0.9$ - $1.4 \times 10^{-12}$ g C cell<sup>-1</sup>), corresponding  
489 well to the maximum capacity seen in the lab-scale activated sludge experiment with surplus  
490 substrate of  $1.3 \times 10^{-12}$ g C cell<sup>-1</sup> (Fig. 3). PHA was subsequently consumed by *Ca.*  
491 *Accumulibacter* in the anoxic denitrification and aerobic tanks. In some plants this process  
492 occurred primarily under denitrifying conditions (Fig. S9) indicating differences in the

493 presence of denitrifying members of this genus<sup>56,18</sup>. Consistently, the glycogen level of *Ca.*  
494 *Accumulibacter* cells was highest in the aerobic tanks ( $0.7\text{-}0.9 \times 10^{-12}$  g C cell<sup>-1</sup>) and always  
495 slightly lower than in the lab-scale experiment (Fig. 3) ( $1.1 \times 10^{-12}$  g C cell<sup>-1</sup>). The absence of  
496 glycogen in detectable quantities throughout P-uptake/release experiments in *T. elongata*  
497 monoculture experiments, and *in situ* in *Tetrasphaera* cells in activated sludge samples (in  
498 contrast to *Ca. Accumulibacter*) demonstrates that glycogen did not act as a carbon reserve  
499 during P-cycling in *Tetrasphaera* (limit of detection for analytes in this study was determined  
500 as described in Supplementary text – 5). The currently accepted standard model says that  
501 glycogen should act as the carbon storage polymer, providing energy and reducing  
502 equivalents to the uptake of P and storage as poly-P. This work does not conform to this  
503 notion, but rather suggests that other cellular carbon reserves (such as fermentation products  
504 or amino acids) may provide the reducing equivalents needed.

505

### 506 ***Tetrasphaera* is more important than *Ca. Accumulibacter* for P-removal**

507 Based on the data obtained from FISH-Raman-microspectroscopy and from qFISH, the relative  
508 contribution of *Ca. Accumulibacter* and members of the genus *Tetrasphaera* to the P-removal  
509 in the eight full-scale EBPR WWTP was calculated. The following P pools were considered:  
510 poly-P stored in *Ca. Accumulibacter* and *Tetrasphaera*, P incorporated into assimilated  
511 biomass (nucleic acids, cell membranes etc.), poly-P in unknown PAO, and P bound in  
512 chemical precipitates (primarily iron, calcium, and aluminium) with the latter two pools being  
513 treated as one as no approach for their differentiation is available (calculations details are  
514 provided in the supplementary material). *Ca. Accumulibacter* and *Tetrasphaera* were both  
515 important in all plants and contained together 24 – 70% of the total P. In 6 of the 8 plants the  
516 contribution of *Tetrasphaera* to the total P-removal was higher than that of *Ca.*  
517 *Accumulibacter* (Fig. 5; Table 1). Our data also demonstrate that there is a relatively high  
518 fraction of removed P in all plants that could either represent chemically precipitated P or be  
519 assigned to the activity of yet undescribed PAO (see P mass balance calculations in  
520 Supplementary text-6). Future studies might want to use a combination of the Raman  
521 microspectroscopy approach developed here, the recently emerging Raman cell sorting  
522 techniques<sup>57</sup>, and single cell genomics to hunt in a targeted manner for such not yet  
523 discovered PAO.

524 In the next few years many EBPR plants will be build world-wide in order to improve effluent  
525 quality of WWTP in a cost-effective and sustainable way and for the recovery of P from  
526 wastewater. This study showed that the long-held view that members of *Ca. Accumulibacter*,  
527 and their “classical PAO” physiology are driving EBPR must be significantly revised. Our study  
528 demonstrates for the first time that the “non-classical” fermentative PAO *Tetrasphaera* are  
529 contributing in the majority of the analysed plants more to EBPR than *Ca. Accumulibacter* and  
530 future studies are now urgently needed to test this on a global scale. Furthermore, it will be  
531 important to determine the affinity (half saturation coefficient for ortho-P) of both PAO clades



532 as promotion of the growth of high affinity PAO will be the desirable in plants with low P-  
533 effluent standards. The unexpected insights obtained in this study became possible via  
534 combining quantitative FISH and quantitative Raman microspectroscopy for absolute  
535 quantification of intracellular storage compounds in FISH-identified PAO taxa. This single-cell  
536 *in situ* approach enables to quantitatively determine the contribution of individual microbial  
537 taxa to storage compound formation in complex microbial communities and thus offers new  
538 opportunities for an in depth functional understanding of EBPR and all other microbial  
539 ecosystems in which such processes are important.

540

#### 541 **Acknowledgements**

542 The study was supported by Innovation Fund Denmark (ReCoverP, 4106-00014B and  
543 NomiGas, 1305-00018B). K. Hansen, J. Dencker, A. Boisen and K. Reitzel are acknowledged for  
544 analyses of total P. M.S. and M.W. were also supported by the European Research Council  
545 Advanced Grant project NITRICARE 294343 (to M.W.).

546

#### 547 **References**

- 548 1. Cordell D, Drangert J-O, & White S. The story of phosphorus: global food security and food  
549 for thought. *Global Environ Chang.* **19**, 292-305 (2009).
- 550 2. Cordell D, Rosemarin A, Schröder J, & Smit A. Towards global phosphorus security: A  
551 systems framework for phosphorus recovery and reuse options. *Chemosphere.* **84**, 747-758  
552 (2011).
- 553 3. Conley DJ, *et al.* Controlling eutrophication: nitrogen and phosphorus. *Science.* **323**, 1014-  
554 1015 (2009).
- 555 4. de-Bashan LE, Bashan Y. Recent advances in removing phosphorus from wastewater and its  
556 future use as fertilizer (1997–2003). *Water Res.* **38**, 4222-4246 (2004).
- 557 5. Blackall LL, Crocetti GR, Saunders AM, & Bond PL A review and update of the microbiology  
558 of enhanced biological phosphorus removal in wastewater treatment plants. *A Van Leeuw J*  
559 *Microb.* **81**, 681-691 (2002).
- 560 6. Melia PM, Cundy AB, Sohi SP, Hooda PS, & Busquets R. Trends in the recovery of  
561 phosphorus in bioavailable forms from wastewater. *Chemosphere.* **186**, 381-395 (2017).
- 562 7. Oehmen A, *et al.* Advances in enhanced biological phosphorus removal: from micro to macro  
563 scale. *Water Res.* **41**, 2271-2300 (2007).
- 564 8. Crocetti GR, *et al.* Identification of polyphosphate-accumulating organisms and design of 16S  
565 rRNA-directed probes for their detection and quantitation. *Appl Environ Microbiol.* **66**, 1175-  
566 1182 (2000).
- 567 9. Hesselmann R, Von Rummell R, Resnick SM, Hany R, & Zehnder A. Anaerobic metabolism of  
568 bacteria performing enhanced biological phosphate removal. *Water Res.* **34**, 3487-3494  
569 (2000).
- 570 10. Hanada S, Liu W-T, Shintani T, Kamagata Y, & Nakamura K. *Tetrasphaera elongata* sp. nov., a  
571 polyphosphate-accumulating bacterium isolated from activated sludge. *Int J Syst Evol*  
572 *Microbiol.* **52**, 883-887 (2002).

- 573 11. Kong Y, Nielsen JL, & Nielsen PH. Identity and ecophysiology of uncultured actinobacterial  
574 polyphosphate-accumulating organisms in full-scale enhanced biological phosphorus  
575 removal plants. *Appl Environ Microbiol.* **71**, 4076-4085 (2005).
- 576 12. Stokholm-Bjerregaard M, *et al.* A critical assessment of the microorganisms proposed to be  
577 important to enhanced biological phosphorus removal in full-scale wastewater treatment  
578 systems. *Front Microbiol.* **8**, (2017).
- 579 13. He S, *et al.* Metatranscriptomic array analysis of '*Candidatus Accumulibacter phosphatis*'-  
580 enriched enhanced biological phosphorus removal sludge. *Environ Microbiol*, **12**, 1205-1217  
581 (2010).
- 582 14. Martín HG, *et al.* Metagenomic analysis of two enhanced biological phosphorus removal  
583 (EBPR) sludge communities. *Nat Biotechnol.* **24**, 1263-1269 (2006).
- 584 15. Oyserman BO, Noguera DR, del Rio TG, Tringe SG, & McMahon KD. Metatranscriptomic  
585 insights on gene expression and regulatory controls in *Candidatus Accumulibacter*  
586 *phosphatis*. *ISME J.* **10**, 810-822 (2016).
- 587 16. Wilmes P, Wexler M, & Bond PL. Metaproteomics provides functional insight into activated  
588 sludge wastewater treatment. *PLoS One.* **3**, e1778 (2008).
- 589 17. McMahon KD & Read EK. Microbial contributions to phosphorus cycling in eutrophic lakes  
590 and wastewater. *Annu Rev Microbiol.* **67**, 199-219 (2013).
- 591 18. Kristiansen R, *et al.* A metabolic model for members of the genus *Tetrasphaera* involved in  
592 enhanced biological phosphorus removal. *ISME J.* **7**, 543-554 (2013).
- 593 19. Nguyen HTT, Kristiansen R, Vestergaard M, Wimmer R, & Nielsen PH. Intracellular  
594 accumulation of glycine in polyphosphate-accumulating organisms in activated sludge – a  
595 novel storage mechanism under dynamic anaerobic-aerobic conditions. **81**, 4809-4818 *Appl*  
596 *Environ Microbiol* (2015).
- 597 20. Martin P & Van Mooy BAS. Fluorometric quantification of polyphosphate in environmental  
598 plankton samples: extraction protocols, matrix effects, and nucleic acid interference. *Appl*  
599 *Environ Microbiol.* **79**, 273-281 (2013).
- 600 21. Liu WT, *et al.* *In situ* identification of polyphosphate-and polyhydroxyalkanoate-  
601 accumulating traits for microbial populations in a biological phosphorus removal process.  
602 *Environ Microbiol.* **3**, 110-122 (2001).
- 603 22. Berry D, *et al.* Tracking heavy water (D<sub>2</sub>O) incorporation for identifying and sorting active  
604 microbial cells. *Proc Natl Acad Sci USA.* **112**, 194-203 (2015).
- 605 23. Eichorst SA, *et al.* Advancements in the application of NanoSIMS and Raman  
606 microspectroscopy to investigate the activity of microbial cells in soils. *FEMS Microbiol Ecol.*  
607 **91**, 1-14 (2015).
- 608 24. Wagner M. Single-cell ecophysiology of microbes as revealed by Raman microspectroscopy  
609 or secondary ion mass spectrometry imaging. *Annu Rev Microbiol.* **63**, 411-429 (2009).
- 610 25. Wang Y, Huang WE, Cui L, & Wagner M. Single cell stable isotope probing in microbiology  
611 using Raman microspectroscopy. *Curr Opin Biotechnol.* **41**, 34-42 (2016).
- 612 26. Berg JS, Schwedt A, Kreuzmann A-C, Kuypers MMM, & Milucka J. Polysulfides as  
613 intermediates in the oxidation of sulfide to sulfate by *Beggiatoa* spp. *Applied and Environ*  
614 *Microbiol.* **80**, 629-636 (2014).
- 615 27. Milucka J, *et al.* Zero-valent sulphur is a key intermediate in marine methane oxidation.  
616 *Nature.* **491**, 541-546 (2012).
- 617 28. Gruber-Vodicka HR, *et al.* *Paracatenula*, an ancient symbiosis between thiotrophic  
618 *Alphaproteobacteria* and catenulid flatworms. *Proc Natl Acad Sci USA.* **108**, 12078-12083  
619 (2011).
- 620 29. Majed N, Matthäus C, Diem M, & Gu AZ. Evaluation of intracellular polyphosphate dynamics  
621 in enhanced biological phosphorus removal process using Raman microscopy. *Environ Sci*  
622 *Technol.* **43**, 5436-5442 (2009).

- 623 30. Majed N & Gu AZ. Application of Raman microscopy for simultaneous and quantitative  
624 evaluation of multiple intracellular polymers dynamics functionally relevant to enhanced  
625 biological phosphorus removal processes. *Environ Sci Technol.* **44**, 8601-8608 (2010).
- 626 31. Majed N, Chernenko T, Diem M, & Gu AZ. Identification of functionally relevant populations  
627 in enhanced biological phosphorus removal processes based on intracellular polymers  
628 profiles and insights into the metabolic diversity and heterogeneity. *Environ Sci Technol.* **46**,  
629 5010-5017 (2012).
- 630 32. Daims H, Stoecker K, & Wagner M. Fluorescence in situ hybridization for the detection of  
631 prokaryotes. *Mol Microb Ecol.* 213:239 (2005).
- 632 33. Falcioni, T. *et al.* Comparison of disruption procedures for enumeration of activated sludge  
633 floc bacteria by flow cytometry. *Cytometry.* **70**, 149-153 (2006)
- 634 34. Williams TM & Unz RF. The nutrition of *Thiothrix*, type 021N, *Beggiatoa* and *Leucothrix*  
635 strains. *Water Res.* **23**, 15-22 (1989).
- 636 35. Yang H & Irudayaraj J. Rapid detection of foodborne microorganisms on food surface using  
637 Fourier transform Raman spectroscopy. *J Mol Struct.* **646**, 35-43 (2003).
- 638 36. Konorov SO, *et al.* Absolute quantification of intracellular glycogen content in human  
639 embryonic stem cells with Raman microspectroscopy. *Anal Chem.* **83**, 6254-6258 (2011).
- 640 37. Papadopoulos F, *et al.* Common tasks in microscopic and ultrastructural image analysis using  
641 ImageJ. *Ultrastruct Pathol.* **31**, 401-407 (2007).
- 642 38. Nguyen HTT, Le VQ, Hansen AA, Nielsen JL, & Nielsen PH. High diversity and abundance of  
643 putative polyphosphate-accumulating *Tetrasphaera*-related bacteria in activated sludge  
644 systems. *FEMS Microbiol Ecol.* **76**, 256-267 (2011).
- 645 39. Bratbak G. Bacterial biovolume and biomass estimations. *Applied and Environ Microbiol.* **49**,  
646 1488-1493 (1985).
- 647 40. Lin-Vien D, Colthup NB, Fateley WG, & Grasselli JG. *The Handbook of Infrared and Raman*  
648 *Characteristic Frequencies of Organic Molecules.* 455 – 476 (Elsevier, New York, 1991).
- 649 41. Daims H, Brühl A, Amann R, Schleifer K-H, & Wagner M. The domain-specific probe EUB338  
650 is insufficient for the detection of all Bacteria: development and evaluation of a more  
651 comprehensive probe set. *Syst Appl Microbiol.* **22**, 434-444 (1999).
- 652 42. Albertsen M, McIlroy SJ, Stokholm-Bjerregaard M, Karst SM, & Nielsen PH. “*Candidatus*  
653 *Propionivibrio aalborgensis*”: a novel glycogen accumulating organism abundant in full-scale  
654 enhanced biological phosphorus removal plants. *Front Microbiol.* **7**, 1033 (2016).
- 655 43. Huang WE, *et al.* Raman-FISH: combining stable-isotope Raman spectroscopy and  
656 fluorescence in situ hybridization for the single cell analysis of identity and function. *Environ*  
657 *Microbiol.* **9**, 1878-1889 (2007).
- 658 44. Amann RI, Krumholz L, & Stahl DA. Fluorescent-oligonucleotide probing of whole cells for  
659 determinative, phylogenetic, and environmental studies in microbiology. *J Bacteriol.* **172**,  
660 762-770 (1990).
- 661 45. Daims H, Lücker S, & Wagner M. Daime, a novel image analysis program for microbial  
662 ecology and biofilm research. *Environ Microbiol.* **8**, 200-213 (2006).
- 663 46. Momba M & Cloete T. The relationship of biomass to phosphate uptake by *Acinetobacter*  
664 *junii* in activated sludge mixed liquor. *Water Res.* **30**, 364-370 (1996).
- 665 47. Fuhs GW & Chen M. Microbiological basis of phosphate removal in the activated sludge  
666 process for the treatment of wastewater. *Microb Ecol.* **2**, 119-138 (1975).
- 667 48. Anjali M, Sukumar C, Kanakalakshmi A, & Shanthi K. Enhancement of growth and production  
668 of polyhydroxyalkanoates by *Bacillus subtilis* from agro-industrial waste as carbon  
669 substrates. *Compos Interfaces.* **21**, 111-119 (2014).
- 670 49. Rojas-Rosas O, Villafañá-Rojas J, López-Dellamary FA, Nungaray-Arellano J, & González-  
671 Reynoso O. Production and characterization of polyhydroxyalkanoates in *Pseudomonas*  
672 *aeruginosa* ATCC 9027 from glucose, an unrelated carbon source. *Can J Microbiol.* **53**, 840-  
673 851 (2007).

- 674 50. Jørgensen MK, *et al.* Unified understanding of physico-chemical properties of activated  
675 sludge and fouling propensity. *Water Res.* **120**, 117-132 (2017).
- 676 51. Günther S, *et al.* Dynamics of polyphosphate-accumulating bacteria in wastewater treatment  
677 plant microbial communities detected via DAPI (4', 6'-diamidino-2-phenylindole) and  
678 tetracycline labeling. *Appl Environ Microbiol.* **75**, 2111-2121 (2009).
- 679 52. Tarayre C, *et al.* Characterisation of phosphate accumulating organisms and techniques for  
680 polyphosphate detection: a review. *Sensors.* **16**, 797 (2016).
- 681 53. Marques R, *et al.* Metabolism and ecological niche of Tetrasphaera and Ca. Accumulibacter  
682 in enhanced biological phosphorus removal. *Water res*, **122**, 159-171 (2017).
- 683 54. Kong Y, Xia Y, & Nielsen PH. Activity and identity of fermenting microorganisms in full-scale  
684 biological nutrient removing wastewater treatment plants. *Environmental microbiology* **10**,  
685 2008-2019 (2008).
- 686 55. Acevedo B, *et al.* Metabolic shift of polyphosphate-accumulating organisms with different  
687 levels of polyphosphate storage. *Water Res.* **46**, 1889-1900 (2012).
- 688 56. Carvalho G, Lemos PC, Oehmen A, & Reis MA. Denitrifying phosphorus removal: linking the  
689 process performance with the microbial community structure. *Water Res.* **41**, 4383-4396  
690 (2007).
- 691 57. Song Y, Yin H, & Huang WE. Raman activated cell sorting. *Curr Opin Chem Biol.* **33**, 1-8  
692 (2016).  
693

694 **Figures and Tables**

695

696 **Figure 1:** (A) Bulk medium ortho-P concentration and COD changes during P-uptake/P-  
697 release experiments using a *T. elongata* pure culture. The patterns reflect substrate uptake  
698 during the anaerobic feed phase coupled to P release, and P uptake during the subsequent  
699 aerobic famine phase. The arrow indicates the point at which cells were washed and the  
700 medium made aerobic. (B) Average changes of the cellular poly-P content as determined by  
701 Raman microspectroscopy on unfixed cells during the P-uptake/release experiment. (C)  
702 Distribution pattern of *T. elongata* cells based on their intracellular poly-P content during  
703 various time points of the P-uptake/release experiment (n = 100 individual *T. elongata* cells  
704 in each instance, mean  $\pm$  SD in error bars).

705 **Figure 2:** Dynamic of intracellular polymers in probe-defined *Ca. Accumulibacter* and  
706 *Tetrasphaera* in lab-scale experiments with activated sludge from Aalborg West full-scale  
707 EBPR plant. A) Bulk medium concentrations of ortho-P and COD changes during 4 h  
708 anaerobic and 8 h aerobic time course experiments. The arrow indicates the point at which  
709 the mixed biomass was washed and the medium was made aerobic. B) Intracellular poly-P  
710 contents of *Ca. Accumulibacter* cells. C) Intracellular poly-P contents of *Tetrasphaera* cells (n  
711 = 100 individual probe defined cells in each instance, mean  $\pm$  SD in error bars). (D)  
712 Intracellular changes in glycogen and PHA content in *Ca. Accumulibacter* cells.

713 **Figure 3:** Composite FISH image of the PAO in the Aalborg West WWTP. *Tetrasphaera*  
714 appears yellow/orange (overlap of hybridization signals from probe Actino658 (Cy3, red),  
715 and the EUB probe mix (FLUOS, green). *Ca. Accumulibacter* appears cyan (overlap of  
716 hybridization signals from probe PAO651 (Cy5, blue) and the EUB probe mix (FLUOS, green)  
717 (Scale bar, 10  $\mu$ m). White and red arrows indicate *Tetrasphaera* and *Ca. Accumulibacter*  
718 cells, respectively.

719 **Figure 4:** Dynamics of intracellular poly-P and PHA/glycogen in *Ca. Accumulibacter* and  
720 *Tetrasphaera* in the different process tanks in Hjørring (A) and Aalborg West (B) EBPR plants.  
721 Intracellular poly-P and intracellular PHA/glycogen are shown for *Ca. Accumulibacter* while  
722 no PHA or glycogen was found in *Tetrasphaera* and thus not shown. An, Hyd, DN, N and RAS  
723 denotes anaerobic, sidestream hydrolysis, denitrification, nitrification (aeration) tanks and  
724 return activated sludge, respectively. The numbers in each stage of the figures indicate the  
725 bulk ortho-P concentrations in mg P L<sup>-1</sup>, mean  $\pm$  SD in error bars, n = 100 individual probe  
726 defined random cells in each instance).

727 **Figure 5:** (A) Absolute distribution of P pools in activated sludge in the aeration tanks of  
728 eight full-scale EBPR plants, and (B) the percentage of total P in the different pools.

**Table – 1:** A summary of all WWTPs investigated, the individual P removal contributions from the two main PAOs, *Ca. Accumulibacter* and *Tetrasphaera* spp. (\*the individual percentage contribution from each PAO to the overall P removal process in each WWTP is denoted within parentheses, Alt – alternating operation, Rec – recirculation, An – anaerobic tank, Hyd – sidestream hydrolysis).

| WWTP location | Design type and presence of anaerobic tank and/or sidestream hydrolysis | qFISH Biovolume fraction (%) |                     | Poly-P in the N tank                                                  |                                                                 | Ortho -P in the N tank (mgP L <sup>-1</sup> ) | Normalized Total P (mgP gSS <sup>-1</sup> ) | Fraction <i>Ca. Accumulibacter</i> (mgP gSS <sup>-1</sup> ) *contribution to overall P removal (%) | Fraction <i>Tetrasphaera</i> (mgP gSS <sup>-1</sup> ) * contribution to overall P removal (%) |
|---------------|-------------------------------------------------------------------------|------------------------------|---------------------|-----------------------------------------------------------------------|-----------------------------------------------------------------|-----------------------------------------------|---------------------------------------------|----------------------------------------------------------------------------------------------------|-----------------------------------------------------------------------------------------------|
|               |                                                                         | <i>Ca. Accumulibacter</i>    | <i>Tetrasphaera</i> | <i>Ca. Accumulibacter</i> (*10 <sup>-13</sup> gP cell <sup>-1</sup> ) | <i>Tetrasphaera</i> (*10 <sup>-13</sup> gP cell <sup>-1</sup> ) |                                               |                                             |                                                                                                    |                                                                                               |
| Hjørring      | Rec (An)                                                                | 1.20 ± 0.5                   | 6.50 ± 0.6          | 4.63 ± 0.32                                                           | 0.86 ± 0.23                                                     | 0.43 ± 0.041                                  | 21.72 ± 2.7                                 | 2.08 ± 0.1 (9.5)                                                                                   | 6.72 ± 0.51 (30.9)                                                                            |
| Randers       | Rec (Hyd)                                                               | 2.34 ± 0.7                   | 6.64 ± 0.2          | 4.08 ± 0.41                                                           | 1.35 ± 0.15                                                     | 0.45 ± 0.26                                   | 22.74 ± 0.48                                | 3.4 ± 0.39 (14.9)                                                                                  | 10.57 ± 0.34 (46.5)                                                                           |
| Viby          | Rec (Hyd)                                                               | 2.72 ± 1.3                   | 2.55 ± 0.7          | 3.14 ± 0.39                                                           | 0.98 ± 0.29                                                     | 0.57 ± 0.22                                   | 24.81 ± 1.2                                 | 3.13 ± 0.22 (12.6)                                                                                 | 2.91 ± 0.21 (11.7)                                                                            |
| Bjerringbro   | Alt (An)                                                                | 4.96 ± 1.4                   | 3.53 ± 0.2          | 4.02 ± 0.39                                                           | 1.25 ± 0.34                                                     | 0.55 ± 0.01                                   | 17.75 ± 0.92                                | 7.35 ± 0.44 (41.4)                                                                                 | 5.19 ± 0.29 (29.2)                                                                            |
| Aalborg East  | Alt (Hyd)                                                               | 1.60 ± 0.6                   | 2.20 ± 0.9          | 4.63 ± 0.49                                                           | 1.33 ± 0.17                                                     | 0.53 ± 0.07                                   | 22.51 ± 3.1                                 | 2.77 ± 0.72 (12.3)                                                                                 | 3.8 ± 0.37 (16.9)                                                                             |
| Aalborg West  | Alt (Hyd)                                                               | 3.60 ± 1.6                   | 3.10 ± 1.6          | 3.68 ± 0.39                                                           | 1.39 ± 0.2                                                      | 1.01 ± 0.21                                   | 37.52 ± 2.9                                 | 5.04 ± 0.28 (13.4)                                                                                 | 5.17 ± 0.33 (13.8)                                                                            |
| Egaa          | Alt (An/Hyd)                                                            | 1.71 ± 0.4                   | 2.04 ± 0.8          | 4.22 ± 0.36                                                           | 1.47 ± 0.41                                                     | 0.28 ± 0.02                                   | 17.33 ± 0.35                                | 2.66 ± 0.24 (15.4)                                                                                 | 3.47 ± 0.39 (20)                                                                              |
| Åby           | Alt (An/Hyd)                                                            | 2.53 ± 1.4                   | 3.84 ± 1.1          | 3.83 ± 0.18                                                           | 1.29 ± 0.62                                                     | 0.33 ± 0.12                                   | 14.84 ± 0.74                                | 3.55 ± 0.64 (23.9)                                                                                 | 5.70 ± 0.47 (38.4)                                                                            |

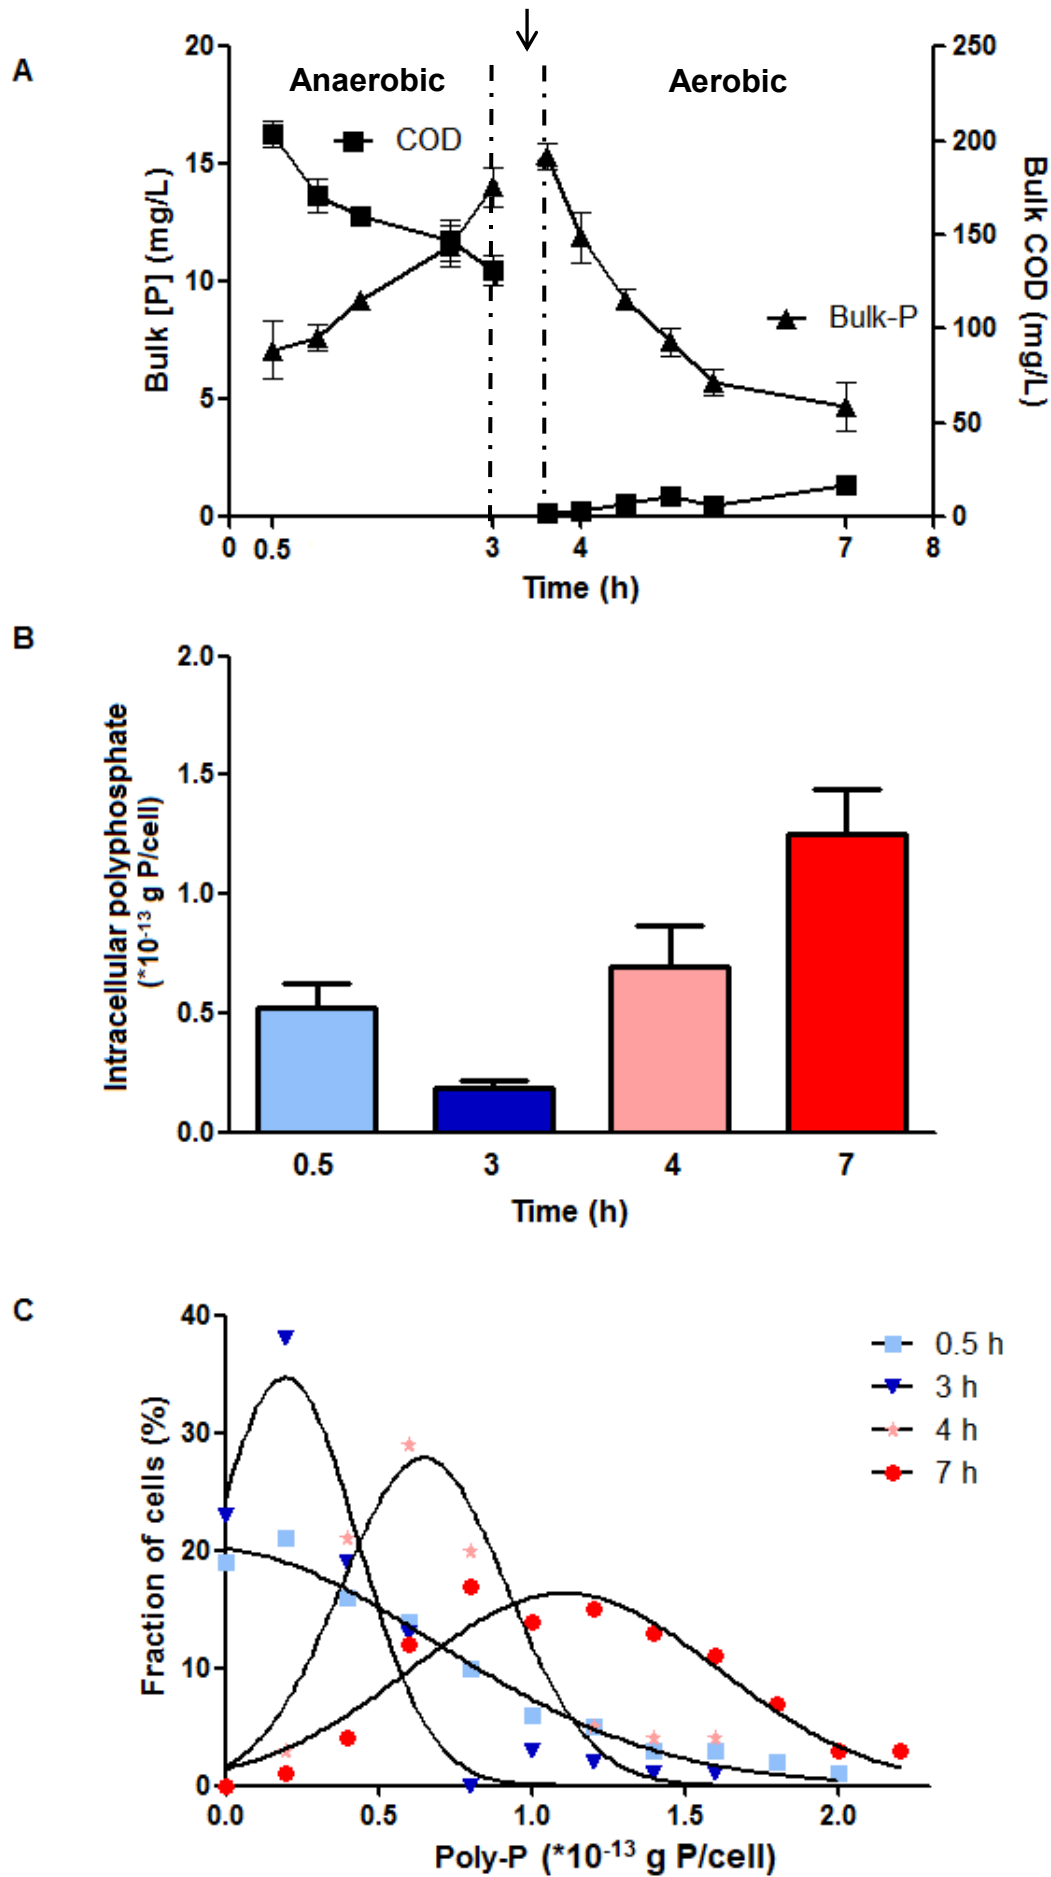



**Figure 1:** (A) Bulk medium ortho-P concentration and COD changes during P-uptake/P-release experiments using a *T. elongata* pure culture. The patterns reflect substrate uptake during the anaerobic feed phase coupled to P release, and P uptake during the subsequent aerobic famine phase. The arrow indicates the point at which cells were washed and the medium made aerobic. (B) Average changes of the cellular poly-P content as determined by Raman microspectroscopy on unfixed cells during the P-uptake/release experiment. (C) Distribution pattern of *T. elongata* cells based on their intracellular poly-P content during various time points of the P-uptake/release experiment (n = 100 individual *T. elongata* cells in each instance, mean  $\pm$  SD in error bars).

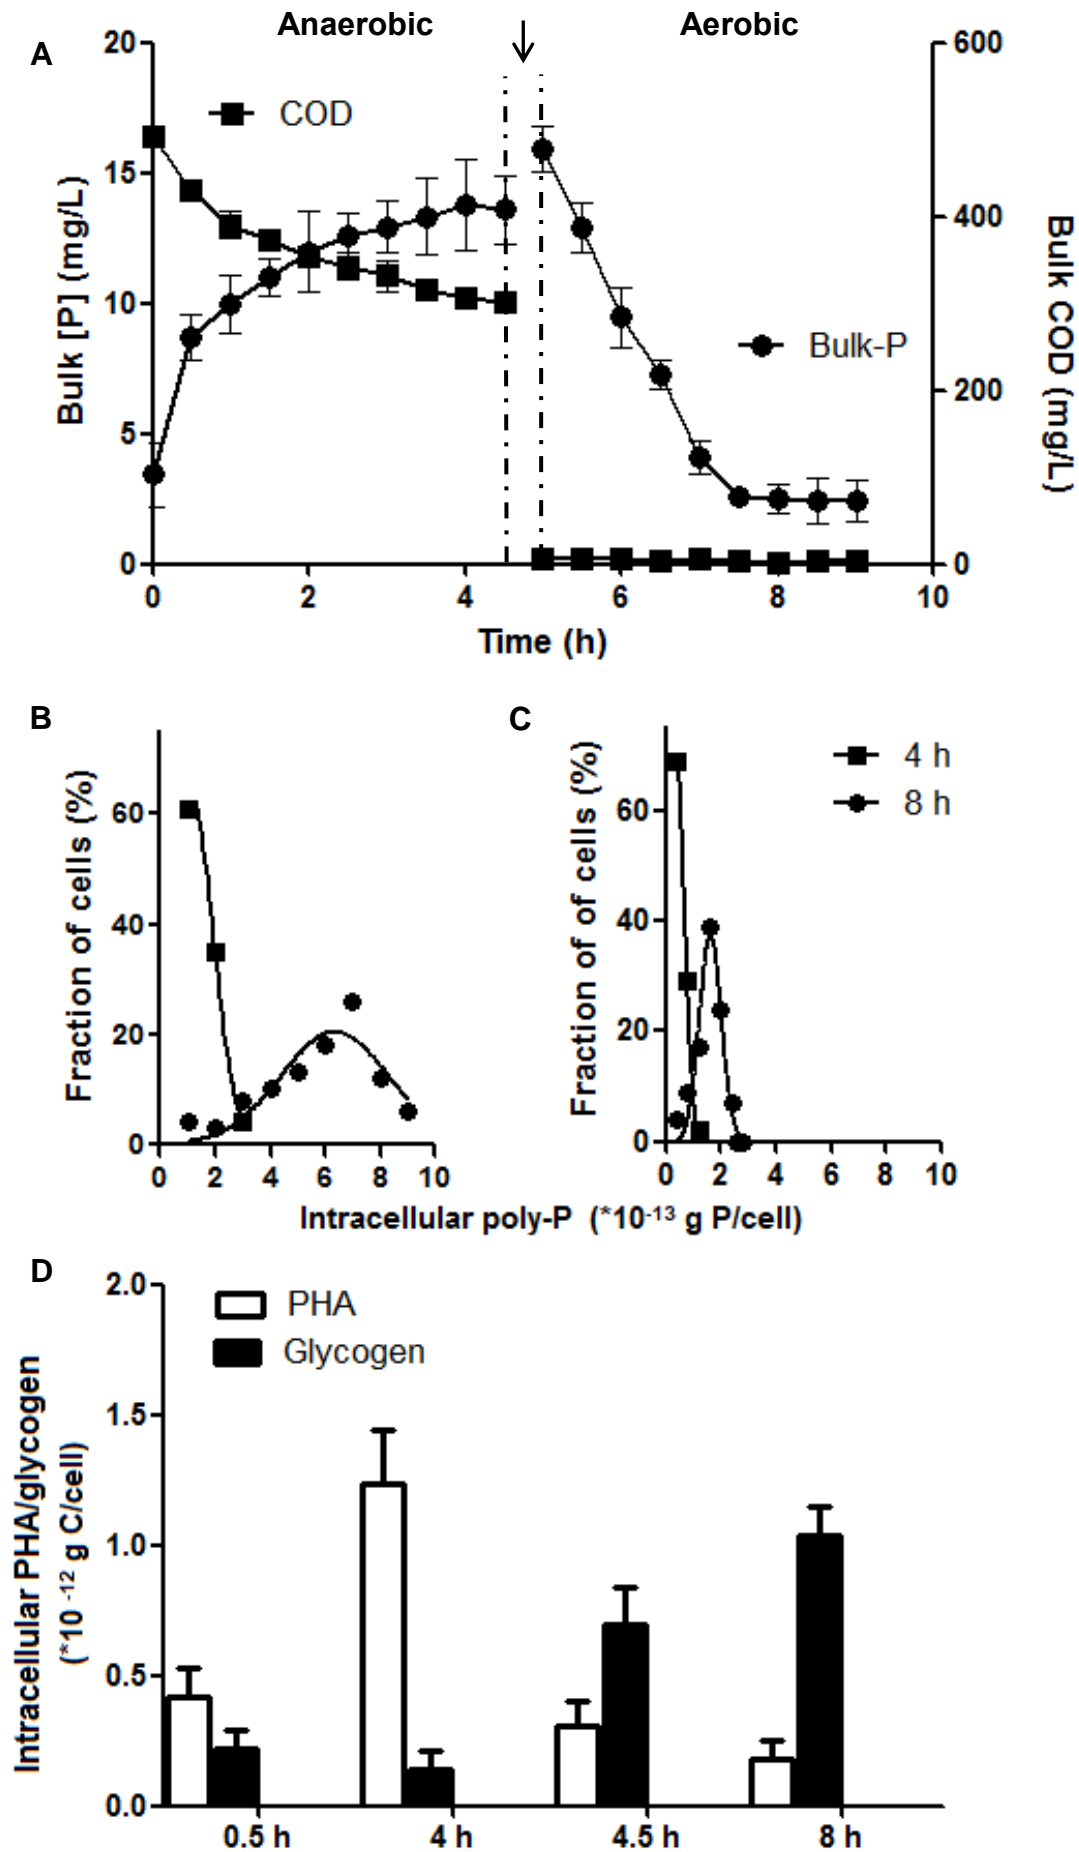

**Figure 2:** Dynamic of intracellular polymers in probe-defined *Ca. Accumulibacter* and *Tetrasphaera* in lab-scale experiments with activated sludge from Aalborg West full-scale EBPR plant. A) Bulk medium concentrations of ortho-P and COD changes during 4 h anaerobic and 8 h aerobic time course experiments. The arrow indicates the point at which the mixed biomass was washed and the medium was made aerobic. B) Intracellular poly-P contents of *Ca. Accumulibacter* cells. C) Intracellular poly-P contents of *Tetrasphaera* cells (n = 100 individual probe defined cells in each instance, mean  $\pm$  SD in error bars). (D) Intracellular changes in glycogen and PHA content in *Ca. Accumulibacter* cells.

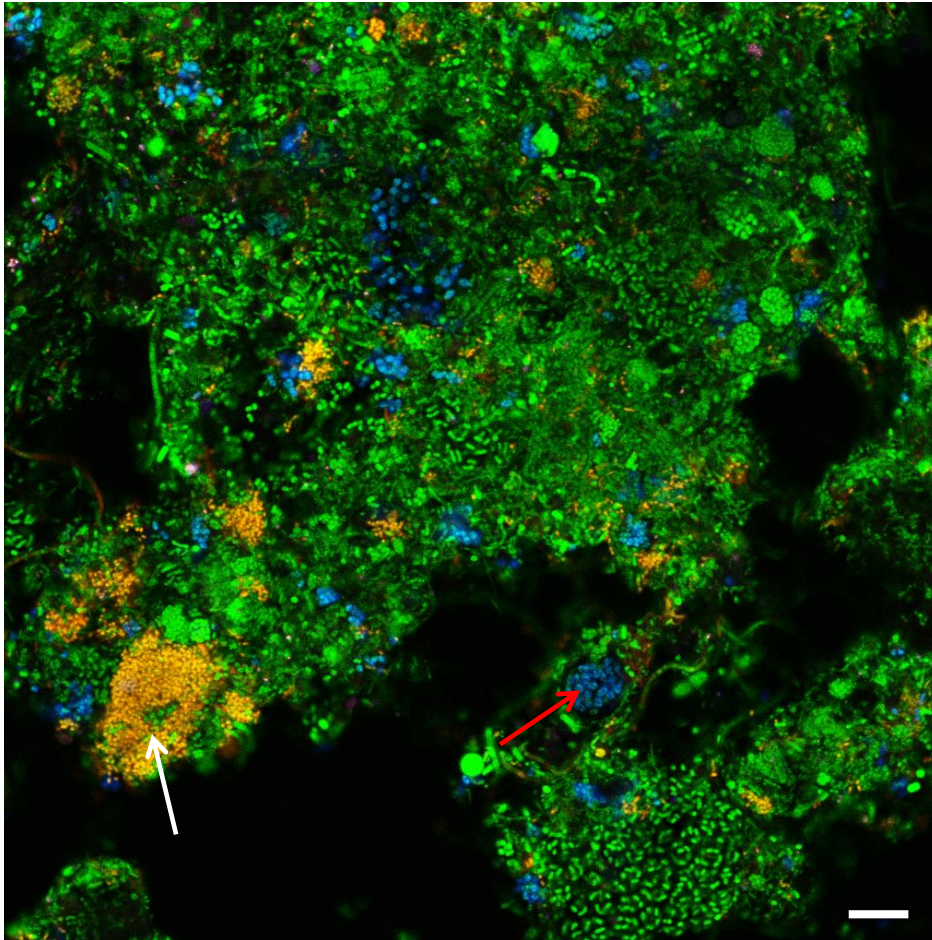

**Figure 3:** Composite FISH image of the PAO in the Aalborg West WWTP. *Tetrasphaera* appears yellow/orange (overlap of hybridization signals from probe Actino658 (Cy3, red), and the EUB probe mix (FLUOS, green)). *Ca. Accumulibacter* appears cyan (overlap of hybridization signals from probe PAO651 (Cy5, blue) and the EUB probe mix (FLUOS, green)) (Scale bar, 10  $\mu$ m). White and red arrows indicate *Tetrasphaera* and *Ca. Accumulibacter* cells, respectively.

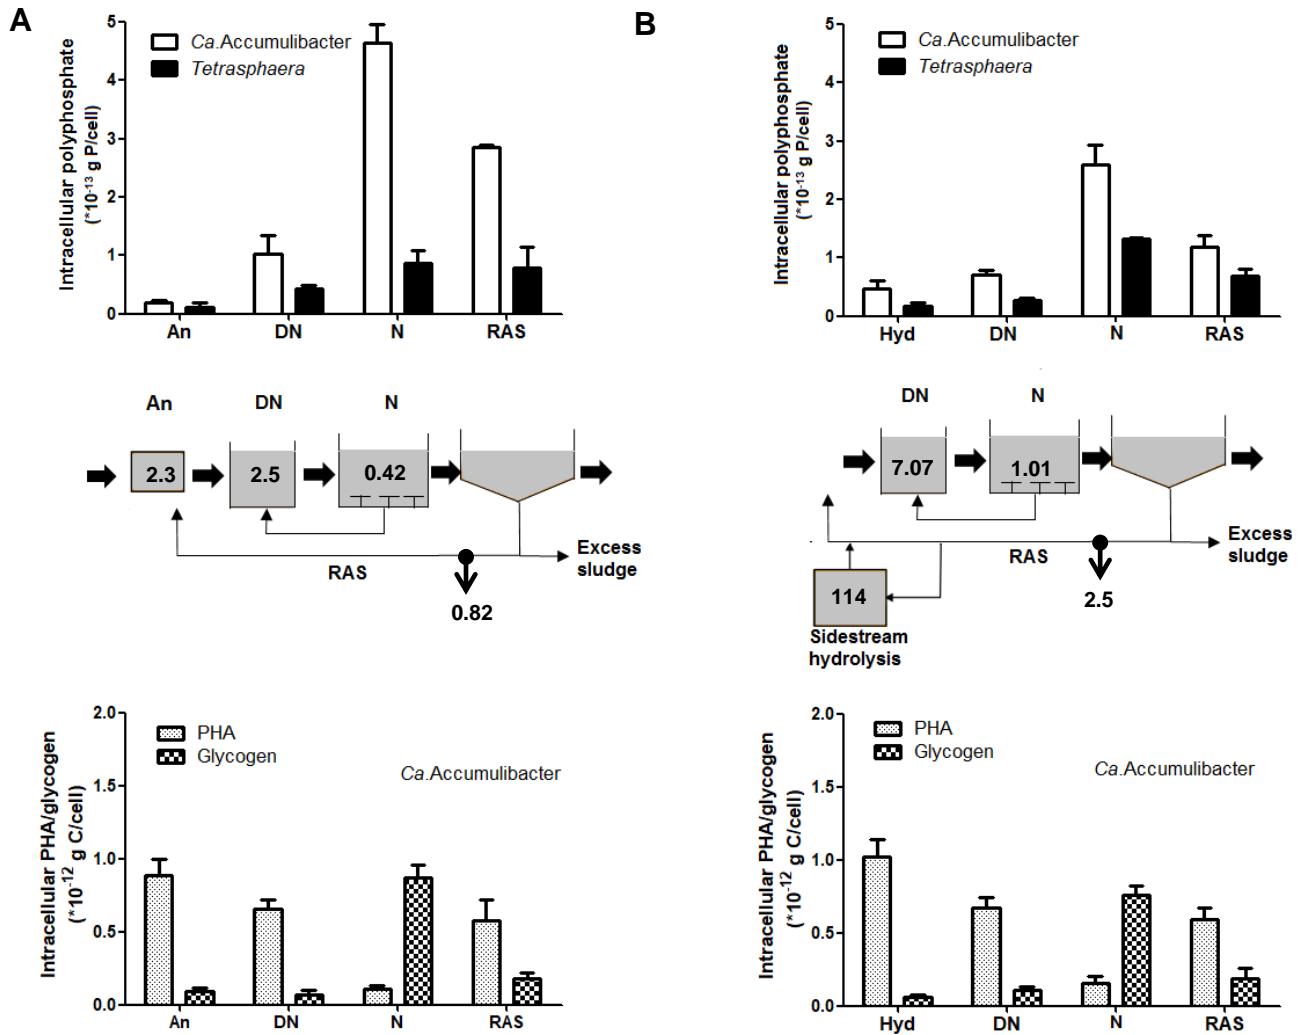

**Figure 4:** Dynamics of intracellular poly-P and PHA/glycogen in *Ca. Accumulibacter* and *Tetrasphaera* in the different process tanks in Hjørring (A) and Aalborg West (B) EBPR plants. Intracellular poly-P and intracellular PHA/glycogen are shown for *Ca. Accumulibacter* while no PHA or glycogen was found in *Tetrasphaera* and thus not shown. An, Hyd, DN, N and RAS denotes anaerobic, sidestream hydrolysis, denitrification, nitrification (aeration) tanks and return activated sludge, respectively. The numbers in each stage of the figures indicate the bulk ortho-P concentrations in mg P L<sup>-1</sup>, mean  $\pm$  SD in error bars, n = 100 individual probe defined random cells in each instance).

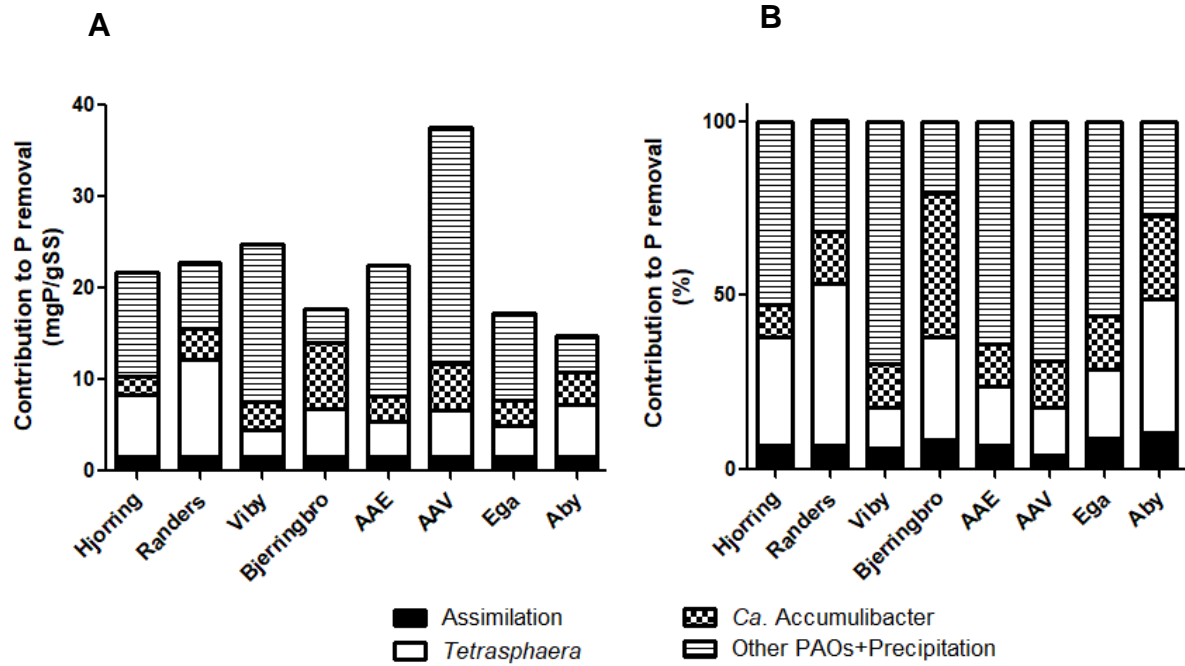

**Figure 5:** (A) Absolute distribution of P pools in activated sludge in the aeration tanks of eight full-scale EBPR plants, and (B) the percentage of total P in the different pools.
